# Supplementary material for: Characterization of Bacterial Differences Induced by Cleft-Palate-Related Spatial Heterogeneity
Source: MDPI journal article supplement (doi:10.3390/pathogens11070771), 2022-07-05
Supplement: s1 [file s1]

# Supplementary materials

**Table S1.** Basic information of included children

| Number  | Diagnosis                      | Gender             | Delivery           | Age (month)        | Number of erupted teeth |
|---------|--------------------------------|--------------------|--------------------|--------------------|-------------------------|
| A1      | RCCL, RCCP, RCCA               | M                  | N                  | 19                 | 12                      |
| A2      | BCCP                           | M                  | N                  | 12                 | 4                       |
| A3      | BCCL after surgery, BCCP       | M                  | C                  | 12                 | 3                       |
| A4      | BCCL after surgery, BCLA, BCCP | F                  | C                  | 15                 | 7                       |
| A5      | RCL after surgery, RCLA, BCCP  | M                  | N                  | 14                 | 7                       |
| A6      | BCCP                           | F                  | C                  | 12                 | 3                       |
| A7      | BCCP                           | F                  | C                  | 12                 | 3                       |
| A8      | BCL after surgery, LCCA, LCCP  | M                  | N                  | 12                 | 4                       |
| A9      | LCCA, LCL, LCCP                | F                  | N                  | 12                 | 4                       |
| A10     | RCCA, RCL after surgery, RCCP  | M                  | N                  | 12                 | 3                       |
| B1      | Control                        | M                  | C                  | 12                 | 4                       |
| B2      | Control                        | F                  | N                  | 12                 | 4                       |
| B3      | Control                        | M                  | N                  | 12                 | 5                       |
| B4      | Control                        | F                  | C                  | 12                 | 3                       |
| B5      | Control                        | M                  | N                  | 12                 | 5                       |
| B6      | Control                        | M                  | N                  | 12                 | 4                       |
| B7      | Control                        | F                  | C                  | 15                 | 8                       |
| B8      | Control                        | M                  | C                  | 12                 | 8                       |
| B9      | Control                        | M                  | N                  | 12                 | 2                       |
| B10     | Control                        | F                  | N                  | 12                 | 2                       |
| P value |                                | 1.000 <sup>2</sup> | 1.000 <sup>2</sup> | 0.279 <sup>1</sup> | 0.969 <sup>1</sup>      |

A1-A10: cleft palate children; B1-B10: healthy children

Diagnostic name notes: CCP, complete cleft palate; CCA, complete cleft alveolar; CCL, complete cleft lip; B, both sides; R, right side; L, left side.

Gender notes: M, male; F, female.

Delivery mode: N, natural labor; C, caesarean birth.

<sup>1</sup> Test by Mann-Whitney U; <sup>2</sup> Test by Fisher's exact

**Table S2.** Comparison of  $\alpha$ -diversity index in oral and nasal samples of two groups in children

| Diversity index<br>(M $\pm$ SD) | CP group                        |                                  | Healthy group                   |                                  |
|---------------------------------|---------------------------------|----------------------------------|---------------------------------|----------------------------------|
|                                 | Saliva                          | Nasal                            | Saliva                          | Nasal                            |
| Ace                             | 195.70 $\pm$ 42.88 <sup>b</sup> | 155.6 $\pm$ 24.70 <sup>b</sup>   | 203.10 $\pm$ 39.00 <sup>c</sup> | 129.90 $\pm$ 45.33 <sup>c</sup>  |
| Chao1                           | 196.80 $\pm$ 43.43 <sup>b</sup> | 140.20 $\pm$ 17.42 <sup>ab</sup> | 198.10 $\pm$ 30.49 <sup>c</sup> | 114.60 $\pm$ 29.20 <sup>ac</sup> |
| Shannon                         | 2.53 $\pm$ 0.49                 | 2.68 $\pm$ 0.21 <sup>a</sup>     | 2.47 $\pm$ 0.46                 | 2.18 $\pm$ 0.31 <sup>a</sup>     |

SD: Standard deviation, CP: Cleft palate

<sup>a</sup>There was significant difference in nasal microbiota between the two groups ( $p < 0.05$ )

<sup>b</sup>There was significant difference between salivary and nasal microbiota in CP group ( $p < 0.05$ )

<sup>c</sup>There was significant difference between salivary and nasal microbiota in healthy group ( $p < 0.05$ )

**Table S3.** Microbial biomarkers of oronasal bacteria of children

| Microbial biomarkers of children   |                        |
|------------------------------------|------------------------|
| Nasal                              | Saliva                 |
| Cleft palate > Healthy             | Healthy > Cleft palate |
| <i>Granulicatella</i>              | <i>Haemophilus</i>     |
| <i>Actinomyces</i> <sup>*†</sup>   | <i>Pseudomonas</i>     |
| <i>Atopobium</i>                   | <i>Aggregatibacter</i> |
| <i>Gemella</i> <sup>*†</sup>       | <i>Serratia</i>        |
| <i>Veillonella</i> <sup>*†</sup>   | <i>Achromobacter</i>   |
| <i>Rothia</i> <sup>*†</sup>        |                        |
| <i>Prevotella</i> <sup>*</sup>     |                        |
| <i>Haemophilus</i>                 |                        |
| <i>Staphylococcus</i>              |                        |
| <i>Streptococcus</i> <sup>*†</sup> |                        |

<sup>\*</sup>O-N bacs in the nasal microbial biomarkers of CP children

<sup>†</sup>TS O-N bacs in the nasal microbial biomarkers of CP children

**Table S4.** Basic information of included adolescents

| Number | Diagnosis                                    | Palatoplasty (yes/no) | Gender             | Age (year)         | DMFT               |
|--------|----------------------------------------------|-----------------------|--------------------|--------------------|--------------------|
| C1     | BCCP                                         | no                    | M                  | 15                 | 0                  |
| C2     | LCCL after surgery, LCCA, LCCP               | no                    | M                  | 18                 | 0                  |
| C3     | LCCL after surgery, LCCA, LCCP               | no                    | M                  | 18                 | 1                  |
| C4     | LCCP                                         | no                    | M                  | 18                 | 0                  |
| C5     | RCCL after surgery, RCCA, RCCP               | no                    | F                  | 13                 | 0                  |
| D1     | BCCL after surgery, BCCP after surgery, BCCA | yes                   | M                  | 13                 | 3                  |
| D2     | LCCL after surgery, LCCP after surgery, LCCA | yes                   | F                  | 18                 | 0                  |
| D3     | LCCL after surgery, LCCP after surgery, LCCA | yes                   | M                  | 18                 | 0                  |
| D4     | LCCP after surgery, LCCA                     | yes                   | M                  | 15                 | 0                  |
| D5     | BCCL after surgery, BCCP after surgery BCCA  | yes                   | M                  | 16                 | 2                  |
| D6     | BCCL after surgery, BCCP after surgery BCCA  | yes                   | M                  | 18                 | 0                  |
| D7     | BCCP after surgery                           | yes                   | M                  | 16                 | 0                  |
| D8     | LCCL after surgery, LCCP after surgery LCCA  | yes                   | F                  | 15                 | 0                  |
| D9     | LCCL after surgery, LCCP after surgery LCCA  | yes                   | M                  | 15                 | 0                  |
| D10    | RCCP after surgery, RCCA                     | yes                   | M                  | 18                 | 2                  |
| E1     | Control                                      | -                     | M                  | 16                 | 0                  |
| E2     | Control                                      | -                     | F                  | 18                 | 0                  |
| E3     | Control                                      | -                     | F                  | 17                 | 0                  |
| E4     | Control                                      | -                     | F                  | 18                 | 0                  |
| E5     | Control                                      | -                     | M                  | 14                 | 2                  |
| E6     | Control                                      | -                     | M                  | 14                 | 0                  |
| E7     | Control                                      | -                     | M                  | 14                 | 1                  |
| E8     | Control                                      | -                     | M                  | 18                 | 0                  |
| E9     | Control                                      | -                     | M                  | 18                 | 0                  |
| E10    | Control                                      | -                     | M                  | 18                 | 0                  |
| P      |                                              |                       | 1.000 <sup>2</sup> | 0.873 <sup>1</sup> | 0.618 <sup>1</sup> |

C1-C5: cleft palate adolescents; D1-D10: postoperative adolescents; E1-E10: healthy adolescents

Diagnostic name notes: CCP, complete cleft palate; CCA, complete cleft alveolar; CCL, complete cleft lip; B, both sides; R, right side; L, left side.

Gender notes: M, male; F, female.

<sup>1</sup> Test by independent-sample Kruskal-Wallis test;

<sup>2</sup> Test by Fisher's exact

**Table S5.** Comparison of  $\alpha$ -diversity index in oral and nasal samples of three adolescence groups

|                |                     | Nasal              |       | Saliva            |       |
|----------------|---------------------|--------------------|-------|-------------------|-------|
|                |                     | M                  | SD    | M                 | SD    |
| <b>Ace</b>     | CP group            | 219.4 <sup>a</sup> | 83.54 | 346.8             | 46.27 |
|                | Postoperative group | 180.6 <sup>a</sup> | 78.61 | 332               | 44.81 |
|                | Healthy group       | 113.6              | 49.16 | 337               | 96.01 |
| <b>Chao1</b>   | CP group            | 182.2 <sup>a</sup> | 72.95 | 342               | 37.98 |
|                | Postoperative group | 161.9 <sup>a</sup> | 67.52 | 307.7             | 50.15 |
|                | Healthy group       | 106.2              | 33.83 | 331.5             | 91.32 |
| <b>Shannon</b> | CP group            | 2.82 <sup>a</sup>  | 0.58  | 3.29              | 0.85  |
|                | Postoperative group | 2.66               | 0.42  | 3.02 <sup>b</sup> | 0.67  |
|                | Healthy group       | 2.33               | 0.24  | 3.71              | 0.56  |

<sup>a</sup>There was significant difference in nasal microbiota between the tag and healthy group

( $p < 0.05$ )

<sup>b</sup>There was significant difference in salivary microbiota between the tag and healthy group

( $p < 0.05$ )

**Table S6.** Microbial biomarkers in the nasal cavity of adolescents

| Microbial biomarkers in the nasal cavity of adolescents |                             |                                        |                             |                                 |
|---------------------------------------------------------|-----------------------------|----------------------------------------|-----------------------------|---------------------------------|
| Cleft palate-Healthy                                    |                             | Postoperative-Healthy                  |                             | Cleft palate-<br>Postoperative  |
| Cleft palate ><br>Healthy                               | Healthy > Cleft<br>palate   | Postoperative ><br>Healthy             | Healthy ><br>Postoperative  | Cleft palate ><br>Postoperative |
| <i>Atopobium</i> <sup>*</sup>                           | <i>Serratia</i>             | <i>Streptococcus</i> <sup>#†</sup>     | <i>Escherichia_Shigella</i> | <i>Dolosigranulum</i>           |
| <i>Oribacterium</i> <sup>*</sup>                        | <i>Escherichia_Shigella</i> | <i>Haemophilus</i> <sup>#</sup>        | <i>Serratia</i>             | <i>Achromobacter</i>            |
| <i>Mycoplasma</i> <sup>*</sup>                          | <i>Rhodococcus</i>          | <i>Parvimonas</i> <sup>#</sup>         |                             | <i>Lautropia</i>                |
| <i>Catonella</i> <sup>*</sup>                           |                             | <i>Gemella</i> <sup>#†</sup>           |                             | <i>Sphingomonas</i>             |
| <i>Campylobacter</i> <sup>*</sup>                       |                             | <i>Peptostreptococcus</i> <sup>#</sup> |                             |                                 |
| <i>Klebsiella</i>                                       |                             | <i>Rothia</i> <sup>*†</sup>            |                             |                                 |
| <i>Rothia</i> <sup>*†</sup>                             |                             | <i>Dialister</i> <sup>#</sup>          |                             |                                 |
| <i>Dialister</i> <sup>*</sup>                           |                             | <i>Porphyromonas</i>                   |                             |                                 |
| <i>Alloprevotella</i> <sup>*†</sup>                     |                             | <i>Catonella</i> <sup>#</sup>          |                             |                                 |
| <i>Veillonella</i> <sup>*†</sup>                        |                             | <i>Fusobacterium</i>                   |                             |                                 |
| <i>Sphingomonas</i>                                     |                             | <i>Campylobacter</i> <sup>#</sup>      |                             |                                 |
| <i>Solobacterium</i>                                    |                             | <i>Actinobacillus</i> <sup>#</sup>     |                             |                                 |
| <i>Selenomonas</i> <sup>*</sup>                         |                             | <i>Oribacterium</i> <sup>#</sup>       |                             |                                 |
| <i>Slackia</i>                                          |                             | <i>Alloprevotella</i> <sup>#†</sup>    |                             |                                 |
| <i>Gemella</i> <sup>*†</sup>                            |                             |                                        |                             |                                 |
| <i>Parvimonas</i> <sup>*</sup>                          |                             |                                        |                             |                                 |
| <i>Peptostreptococcus</i> <sup>*</sup>                  |                             |                                        |                             |                                 |
| <i>Filifactor</i> <sup>*</sup>                          |                             |                                        |                             |                                 |
| <i>Prevotella</i> <sup>*</sup>                          |                             |                                        |                             |                                 |
| <i>Porphyromonas</i> <sup>*</sup>                       |                             |                                        |                             |                                 |
| <i>Streptococcus</i> <sup>*†</sup>                      |                             |                                        |                             |                                 |

<sup>\*</sup>O-N bacs in the nasal microbial biomarkers of CP adolescents

<sup>#</sup>O-N bacs in the nasal microbial biomarkers of postoperative adolescents

<sup>†</sup>TS O-N bacs in the nasal microbial biomarkers of CP adolescents and postoperative adolescents

**Table S7.** Microbial biomarkers in the saliva of adolescents

| Microbial biomarkers in the saliva of adolescents |                            |                            |                                 |
|---------------------------------------------------|----------------------------|----------------------------|---------------------------------|
| Cleft palate-Healthy                              | Postoperative - Healthy    |                            | Cleft palate- Postoperative     |
| Healthy > Cleft<br>palate                         | Postoperative ><br>Healthy | Healthy ><br>Postoperative | Cleft palate ><br>Postoperative |
| <i>Pseudomonas</i>                                | <i>Streptococcus</i>       | <i>Achromobacter</i>       | <i>Campylobacter</i>            |
| <i>Serratia</i>                                   | <i>Granulicatella</i>      | <i>Stenotrophomonas</i>    | <i>Leptotrichia</i>             |
| <i>Stenotrophomonas</i>                           |                            | <i>Veillonella</i>         |                                 |
| <i>Achromobacter</i>                              |                            | <i>Solobacterium</i>       |                                 |
| <i>Kingella</i>                                   |                            | <i>Serratia</i>            |                                 |
| <i>Rhodococcus</i>                                |                            | <i>Burkholderia</i>        |                                 |
|                                                   |                            | <i>Pseudomonas</i>         |                                 |

**Table S8.** Translocation bacteria between oral and nasal cavity CP children

| Direction      | Genera                      | Proportion (%) |         |           |          |
|----------------|-----------------------------|----------------|---------|-----------|----------|
|                |                             | CP-nasal       | H-nasal | CP-saliva | H-saliva |
| Nasal—<br>Oral | <i>Cyanobacteria_norank</i> | 0.023%         | 0.003%  | 0.012%    | 0.002%   |
|                | <i>Dolosigranulum</i>       | 8.865%         | 15.488% | 0.015%    | 0.000%   |
|                | <i>Staphylococcus</i>       | 4.132%         | 0.048%  | 0.012%    | 0.002%   |
|                | <i>Acinetobacter</i>        | 0.017%         | 0.037%  | 0.008%    | 0.000%   |
| Oral—<br>Nasal | <i>Actinomyces</i>          | 0.340%         | 0.005%  | 1.347%    | 0.503%   |
|                | <i>Prevotella</i>           | 0.987%         | 0.008%  | 2.993%    | 1.238%   |
|                | <i>Rothia</i>               | 1.018%         | 0.013%  | 1.262%    | 0.983%   |
|                | <i>Streptococcus</i>        | 11.300%        | 0.502%  | 57.372%   | 54.840%  |
|                | <i>Neisseria</i>            | 0.147%         | 0.058%  | 9.580%    | 7.768%   |
|                | <i>Veillonella</i>          | 0.833%         | 0.027%  | 3.675%    | 3.943%   |
|                | <i>Gemella</i>              | 0.432%         | 0.017%  | 3.883%    | 2.332%   |
|                | <i>Alloprevotella</i>       | 0.293%         | 0.015%  | 2.962%    | 4.272%   |
|                | <i>Lautropia</i>            | 0.005%         | 0.000%  | 0.338%    | 0.098%   |

Nasal-Oral: Common nasal bacteria translocated to oral microbiota

Oral-Nasal: Common oral bacteria translocated to nasal microbiota

CP: Cleft palate group

H: Health group

**Table S9.** Translocation bacteria between oral and nasal cavity in CP adolescents

| Directi<br>on  | Genera                                           | Proportion (%) |                |         |               |                 |          |
|----------------|--------------------------------------------------|----------------|----------------|---------|---------------|-----------------|----------|
|                |                                                  | CP-nasal       | Post-<br>nasal | H-nasal | CP-<br>saliva | Post-<br>saliva | H-saliva |
| Nasal          | <i>Staphylococcus</i>                            | 3.420%         | 7.573%         | 3.868%  | 0.040%        | 0.022%          | 0.002%   |
| —Oral          | <i>Corynebacterium</i>                           | 3.397%         | 2.792%         | 3.868%  | 1.147%        | 0.560%          | 0.913%   |
| Oral—<br>Nasal | <i>Actinobacillus</i>                            | 0.037%         | 0.095%         | 0.003%  | 1.410%        | 0.470%          | 0.352%   |
|                | <i>Actinomyces</i>                               | 0.103%         | 0.113%         | 0.008%  | 1.230%        | 2.103%          | 2.637%   |
|                | <i>Alloprevotella</i>                            | 0.177%         | 0.118%         | 0.002%  | 0.407%        | 0.548%          | 0.340%   |
|                | <i>Atopobium</i>                                 | 0.027%         | 0.020%         | 0.000%  | 0.033%        | 0.067%          | 0.060%   |
|                | <i>Campylobacter</i>                             | 0.097%         | 0.032%         | 0.000%  | 0.183%        | 0.130%          | 0.157%   |
|                | <i>Catonella</i>                                 | 0.083%         | 0.050%         | 0.002%  | 0.177%        | 0.298%          | 0.233%   |
|                | <i>Dialister</i>                                 | 0.017%         | 0.017%         | 0.000%  | 0.060%        | 0.045%          | 0.038%   |
|                | <i>Family_XIII_incertae_sedis</i>                | 0.430%         | 0.028%         | 0.000%  | 0.143%        | 0.128%          | 0.222%   |
|                | <i>Filifactor</i>                                | 1.347%         | 0.040%         | 0.000%  | 0.173%        | 0.102%          | 0.202%   |
|                | <i>Lachnoanaerobaculum</i>                       | 0.030%         | 0.035%         | 0.003%  | 0.927%        | 0.327%          | 0.502%   |
|                | <i>Leptotrichia</i>                              | 0.040%         | 0.067%         | 0.003%  | 3.433%        | 0.743%          | 1.430%   |
|                | <i>Mogibacterium</i>                             | 0.013%         | 0.012%         | 0.000%  | 0.017%        | 0.010%          | 0.025%   |
|                | <i>Mycoplasma</i>                                | 0.013%         | 0.020%         | 0.000%  | 0.017%        | 0.003%          | 0.012%   |
|                | <i>Oribacterium</i>                              | 0.063%         | 0.027%         | 0.000%  | 0.277%        | 0.487%          | 0.470%   |
|                | <i>Parvimonas</i>                                | 0.677%         | 1.662%         | 0.002%  | 0.067%        | 0.070%          | 0.088%   |
|                | <i>Peptostreptococcaceae_incer<br/>tae_sedis</i> | 0.110%         | 0.025%         | 0.003%  | 0.130%        | 0.055%          | 0.228%   |
|                | <i>Peptostreptococcus</i>                        | 0.953%         | 0.800%         | 0.000%  | 0.167%        | 0.210%          | 0.512%   |
|                | <i>Rothia</i>                                    | 0.137%         | 0.510%         | 0.000%  | 2.093%        | 2.245%          | 4.073%   |
|                | <i>Tannerella</i>                                | 0.140%         | 0.017%         | 0.002%  | 0.793%        | 0.140%          | 0.183%   |
|                | <i>Treponema</i>                                 | 0.133%         | 0.023%         | 0.002%  | 0.287%        | 0.137%          | 0.353%   |
|                | <i>Streptococcus</i>                             | 2.850%         | 4.412%         | 0.100%  | 45.413%       | 56.365%         | 29.637%  |
|                | <i>Gemella</i>                                   | 0.627%         | 1.207%         | 0.012%  | 4.663%        | 3.263%          | 2.208%   |
|                | <i>Neisseria</i>                                 | 0.187%         | 0.238%         | 0.045%  | 6.343%        | 5.913%          | 6.130%   |
|                | <i>Veillonella</i>                               | 0.070%         | 0.025%         | 0.020%  | 1.740%        | 1.095%          | 2.803%   |
|                | <i>Bergeyella</i>                                | 0.020%         | 0.008%         | 0.002%  | 0.750%        | 1.475%          | 1.028%   |
|                | <i>Candidate_division_TM7_no<br/>rank</i>        | 0.027%         | 0.007%         | 0.000%  | 0.767%        | 0.133%          | 0.632%   |
|                | <i>Eikenella</i>                                 | 0.023%         | 0.008%         | 0.008%  | 0.233%        | 0.108%          | 0.120%   |
|                | <i>Family_XIII_uncultured</i>                    | 0.073%         | 0.005%         | 0.000%  | 0.017%        | 0.023%          | 0.163%   |
|                | <i>Johnsonella</i>                               | 0.123%         | 0.010%         | 0.002%  | 0.557%        | 0.105%          | 0.160%   |
|                | <i>Peptococcus</i>                               | 0.247%         | 0.003%         | 0.000%  | 0.050%        | 0.017%          | 0.045%   |
|                | <i>Pseudoramibacter</i>                          | 0.033%         | 0.000%         | 0.000%  | 0.007%        | 0.005%          | 0.008%   |
|                | <i>Selenomonas</i>                               | 0.020%         | 0.005%         | 0.002%  | 0.763%        | 0.212%          | 0.670%   |
|                | <i>Synergistaceae_uncultured</i>                 | 0.023%         | 0.003%         | 0.000%  | 0.030%        | 0.025%          | 0.018%   |
|                | <i>Fusobacterium</i>                             | 1.503%         | 0.400%         | 0.017%  | 2.687%        | 1.698%          | 2.800%   |
|                | <i>Porphyromonas</i>                             | 1.380%         | 0.405%         | 0.013%  | 2.500%        | 2.233%          | 2.577%   |
|                | <i>Prevotella</i>                                | 1.320%         | 0.747%         | 0.052%  | 2.757%        | 3.382%          | 3.637%   |
|                | <i>Abiotrophia</i>                               | 0.003%         | 0.017%         | 0.002%  | 0.720%        | 0.355%          | 0.347%   |

|                             |        |        |        |        |        |        |
|-----------------------------|--------|--------|--------|--------|--------|--------|
| <i>Actinobaculum</i>        | 0.003% | 0.012% | 0.000% | 0.063% | 0.143% | 0.027% |
| <i>Aggregatibacter</i>      | 0.003% | 0.043% | 0.007% | 0.600% | 0.398% | 0.552% |
| <i>Neisseriaceae_norank</i> | 0.000% | 0.023% | 0.003% | 0.020% | 0.205% | 0.385% |
| <i>Haemophilus</i>          | 0.657% | 4.183% | 0.072% | 2.077% | 2.960% | 4.417% |

Nasal-Oral: Common nasal bacteria translocated to oral microbiota

Oral-Nasal: Common oral bacteria translocated to nasal microbiota

CP: Cleft palate group

H: Health group

Post: Postoperative group

In the oral-nasal part, black font: Exchange genera of CP and postoperative adolescents

Red font: Exchange genera of CP adolescents only

Green font: Exchange genera of postoperative adolescents only

**Table S10.** Dominant oral bacteria ( > 1%) in each group

| Children                                    |                               |                                             | Adolescents                                 |                                 |
|---------------------------------------------|-------------------------------|---------------------------------------------|---------------------------------------------|---------------------------------|
| CP-saliva                                   | H-saliva                      | Post-saliva                                 | CP-saliva                                   | H-saliva                        |
| <i>Streptococcus</i> (57.37%)* <sup>†</sup> | <i>Streptococcus</i> (54.84%) | <i>Streptococcus</i> (56.37%)* <sup>†</sup> | <i>Streptococcus</i> (45.41%)* <sup>†</sup> | <i>Streptococcus</i> (29.6%)    |
| <i>Neisseria</i> (9.58%)* <sup>†</sup>      | <i>Neisseria</i> (7.77%)      | <i>Neisseria</i> (5.91%)* <sup>†</sup>      | <i>Neisseria</i> (6.34%)* <sup>†</sup>      | <i>Pseudomonas</i> (10.00%)     |
| <i>Granulicatella</i> (4.12%)               | <i>Granulicatella</i> (5.57%) | <i>Prevotella</i> (3.38%)                   | <i>Gemella</i> (4.66%)* <sup>†</sup>        | <i>Serratia</i> (6.64%)         |
| <i>Gemella</i> (3.88%)* <sup>†</sup>        | <i>Bergeyella</i> (4.66%)     | <i>Gemella</i> (3.26%)* <sup>†</sup>        | <i>Leptotrichia</i> (3.43%)* <sup>†</sup>   | <i>Neisseria</i> (6.13%)        |
| <i>Veillonella</i> (3.68%)* <sup>†</sup>    | <i>Alloprevotella</i> (4.27%) | <i>Haemophilus</i> (2.96%)* <sup>†</sup>    | <i>Granulicatella</i> (3%)                  | <i>Haemophilus</i> (4.42%)      |
| <i>Prevotella</i> (2.99%)*                  | <i>Veillonella</i> (3.94%)    | <i>Granulicatella</i> (2.58%)               | <i>Prevotella</i> (2.76%)* <sup>†</sup>     | <i>Rothia</i> (4.07%)           |
| <i>Alloprevotella</i> (2.96%)* <sup>†</sup> | <i>Haemophilus</i> (3.17%)    | <i>Pseudomonas</i> (2.37%)                  | <i>Fusobacterium</i> (2.69%)* <sup>†</sup>  | <i>Prevotella</i> (3.64%)       |
| <i>Bergeyella</i> (2.57%)                   | <i>Porphyromonas</i> (2.34%)  | <i>Rothia</i> (2.25%)* <sup>†</sup>         | <i>Capnocytophaga</i> (2.63%)               | <i>Veillonella</i> (2.80%)      |
| <i>Porphyromonas</i> (1.75%)                | <i>Gemella</i> (2.33%)        | <i>Porphyromonas</i> (2.23%)                | <i>Porphyromonas</i> (2.5%)* <sup>†</sup>   | <i>Fusobacterium</i> (2.80%)    |
| <i>Actinomyces</i> (1.35%)* <sup>†</sup>    | <i>Pseudomonas</i> (1.95%)    | <i>Actinomyces</i> (2.10%)* <sup>†</sup>    | <i>Rothia</i> (2.09%)* <sup>†</sup>         | <i>Actinomyces</i> (2.64%)      |
| <i>Rothia</i> (1.26%)* <sup>†</sup>         | <i>Prevotella</i> (1.24%)     | <i>Fusobacterium</i> (1.70%)                | <i>Haemophilus</i> (2.08%)                  | <i>Porphyromonas</i> (2.58%)    |
| <i>Haemophilus</i> (1.01%)                  |                               | <i>Bergeyella</i> (1.48%)                   | <i>Veillonella</i> (1.74%)* <sup>†</sup>    | <i>Stenotrophomonas</i> (2.40%) |
|                                             |                               | <i>Serratia</i> (1.38%)                     | <i>Pseudomonas</i> (1.66%)                  | <i>Gemella</i> (2.21%)          |
|                                             |                               | <i>Veillonella</i> (1.10%)* <sup>†</sup>    | <i>Actinobacillus</i> (1.41%)* <sup>†</sup> | <i>Achromobacter</i> (1.82%)    |
|                                             |                               |                                             | <i>Actinomyces</i> (1.23%)* <sup>†</sup>    | <i>Lautropia</i> (1.59%)        |
|                                             |                               |                                             | <i>Corynebacterium</i> (1.15%)              | <i>Leptotrichia</i> (1.43%)     |
|                                             |                               |                                             |                                             | <i>Capnocytophaga</i> (1.41%)   |
|                                             |                               |                                             |                                             | <i>Granulicatella</i> (1.25%)   |
|                                             |                               |                                             |                                             | <i>Bergeyella</i> (1.03%)       |

\*O-N bacs in the oral dominant bacteria of CP children

\*O-N bacs in the oral dominant bacteria of postoperative adolescents

#O-N bacs in the oral dominant bacteria of CP adolescents

<sup>†</sup>TS O-N bacs in the oral dominant bacteria

CP: Cleft palate group

H: Health group

Post: Postoperative group
